# Supplementary material for: RASSF8 regulates progression of cutaneous melanoma through nuclear factor-κb
Source: Oncotarget. 2015 Aug 17;6(30):30165–77. doi: 10.18632/oncotarget.5030 (PMC4745788; doi:10.18632/oncotarget.5030)
Supplement: Supplementary file 1 [file oncotarget-06-30165-s001.pdf]

## SUPPLEMENTARY FIGURES AND TABLES

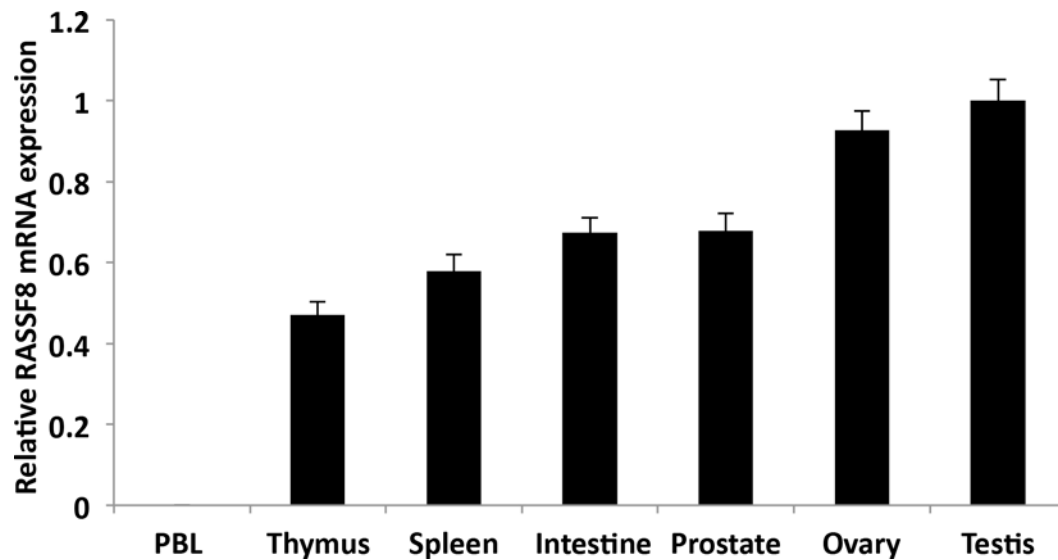

**Supplementary Figure S1: RASSF8 expression in different organs.** RASSF8 expression was observed in different human normal organs. There is higher RASSF8 mRNA expression level in ovary and testis compared to other organs.

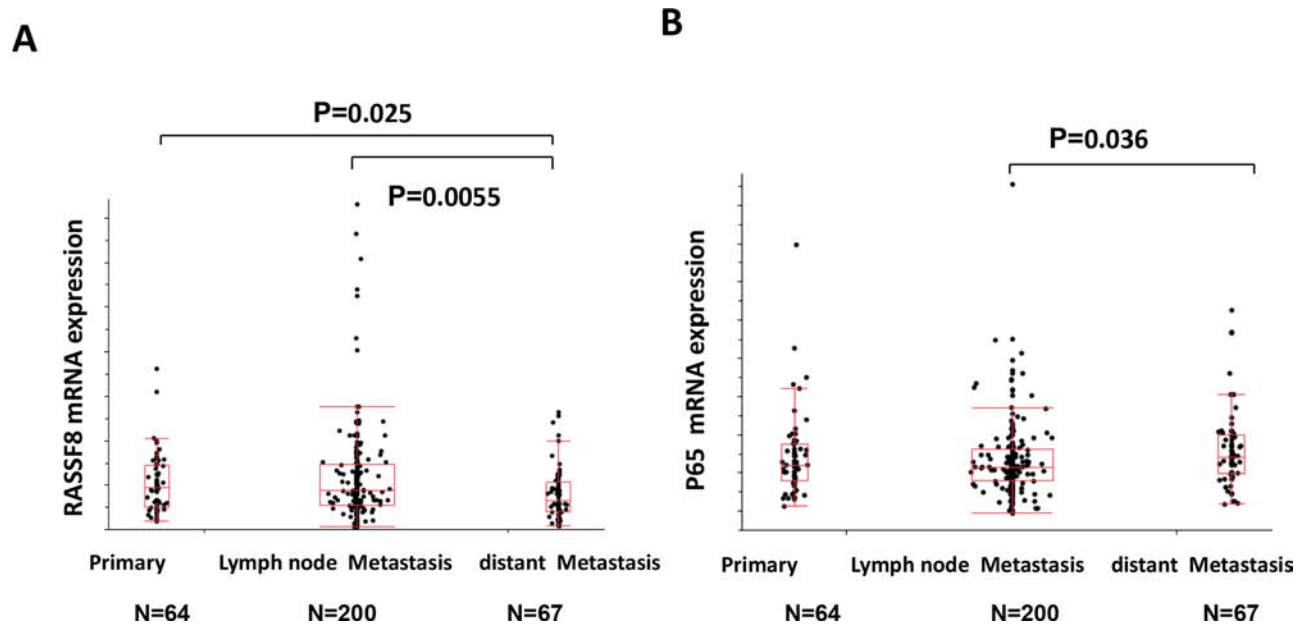

**Supplementary Figure S2: RASSF8 mRNA expression and P65 mRNA expression in TCGA melanomas.** **A.** RASSF8 mRNA expression in primary, lymph node metastasis and distant metastasis melanomas. There was significantly lower RASSF8 expression in distant metastasis melanomas than in primary melanoma and lymph node metastasis. **B.** P65 mRNA expression in primary, lymph node metastasis and distant metastasis melanoma. There is significantly higher P65 expression in distant metastasis melanoma than in lymph node metastasis.

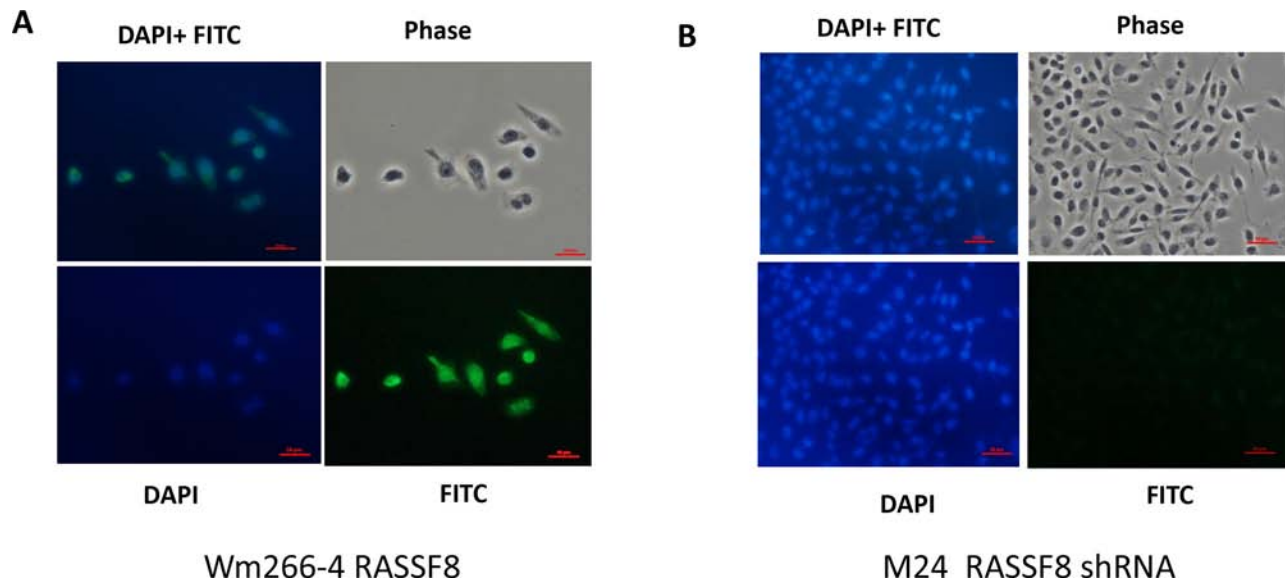

**Supplementary Figure S3: Immunofluorescence staining of RASSF8 by mouse monoclonal anti-RASSF8 Ab (Abcam, Cambridge, MA, Cat.# ab56921) in RASSF8 overexpressed cells and knockdown cells. A.** There was a strong fluorescence in RASSF8 overexpression cells. **B.** There was very weak fluorescence activity in RASSF8 knockdown cells.

**A**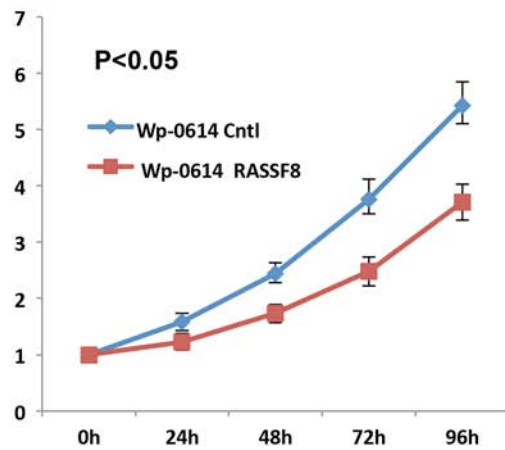**B**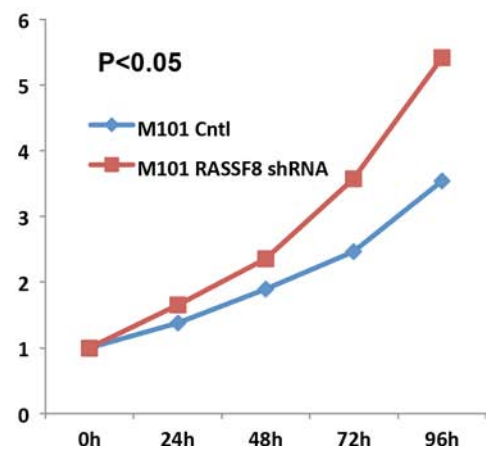

**Supplementary Figure S4: Cell growth of Wp-0614 Cntl and Wp-0614 RASSF8, M101 Cntl and M101 shRNA. A.** Overexpression of RASSF8 inhibited cell growth. **B.** Knockdown of RASSF8 expression promoted cell growth.

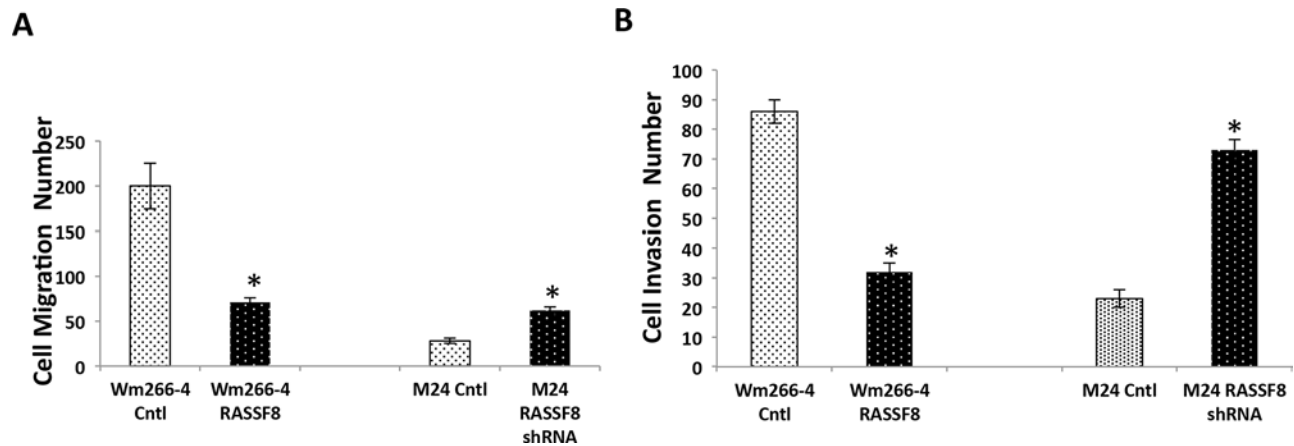

**Supplementary Figure S5: Quantification of cell migration and invasion.** **A.** Cell migration of Wm266-4 RASSF8 was significantly decreased compared to Wm266-4 Cntl respectively ( $N = 3$ ), whereas cell migration of M24 shRNA was significantly increased compared to M24 Cntl respectively ( $N = 3$ ) ( $*p < 0.05$ ). **B.** Cell invasion of Wm266-4 RASSF8 was significantly decreased compared to Wm266-4 Cntl, respectively ( $N = 3$ ), whereas cell invasion of M24 shRNA was significantly increased compared to M24 Cntl, respectively ( $N = 3$ ) ( $*p < 0.05$ ).

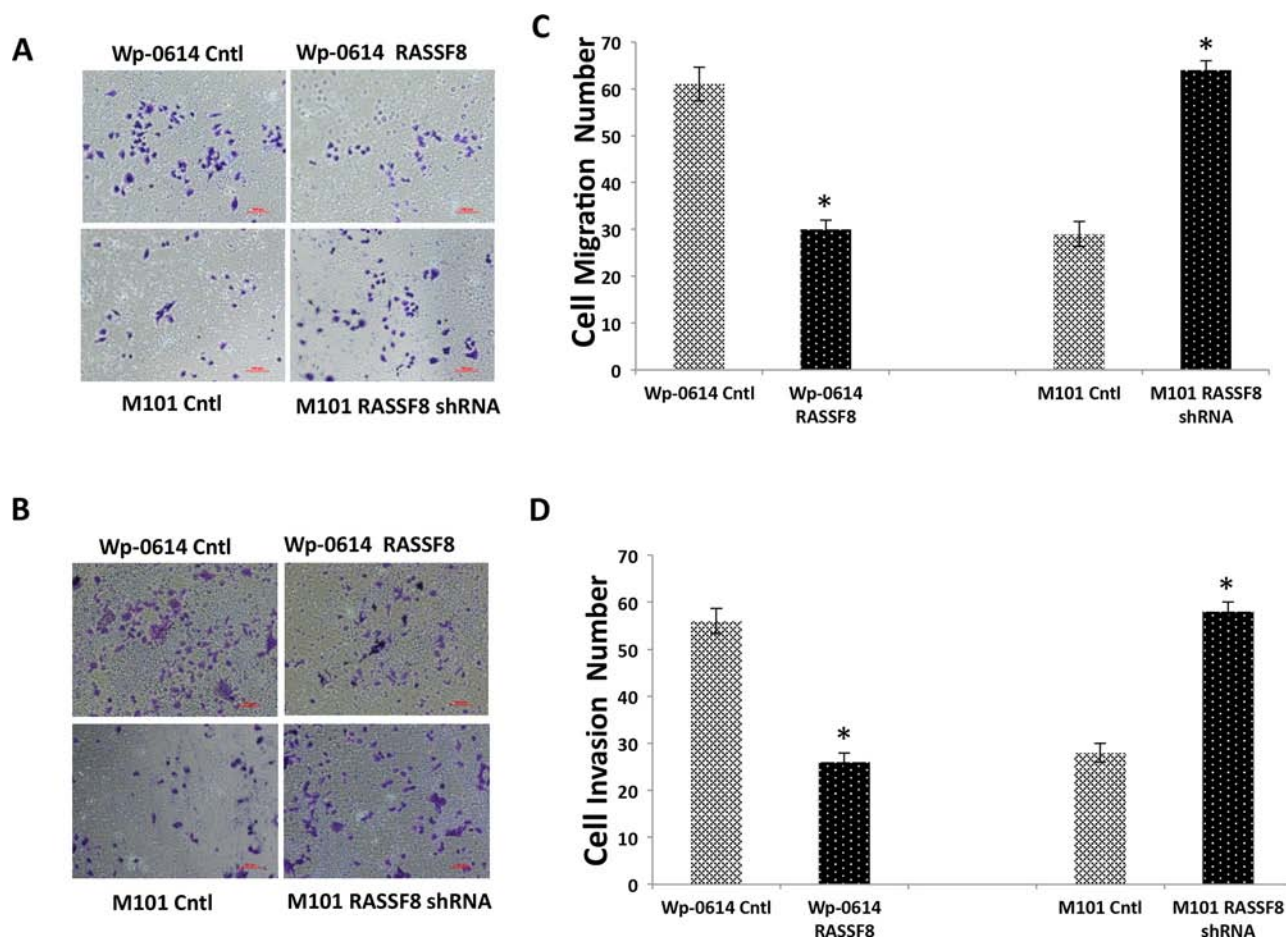

**Supplementary Figure S6: Migration and invasion of Wp-0614 Cntl and Wp-0614 RASSF8, M101 Cntl and M101 shRNA.** **A.** Migration analysis of Wp-0614 Cntl vs Wp-0614 RASSF8, M101 Cntl vs M101 shRNA. **B.** Invasion analysis of Wp-0614 Cntl vs Wp-0614 RASSF8, M101 Cntl vs M101 shRNA. **C.** Quantification of migration ( $N = 3$ ). cell migration of Wp-0614 RASSF8 was decreased significantly compared to Wp-0614 Cntl whereas cell migration of M101 shRNA was increased significantly compared to M101 Cntl ( $*p < 0.05$ ). **D.** Quantification of invasion ( $N = 3$ ). Cell invasion of Wp-0614 RASSF8 was decreased significantly compared to Wp-0614 Cntl, whereas cell invasion of M101 shRNA was increased significantly compared to M101 Cntl ( $*p < 0.05$ ).

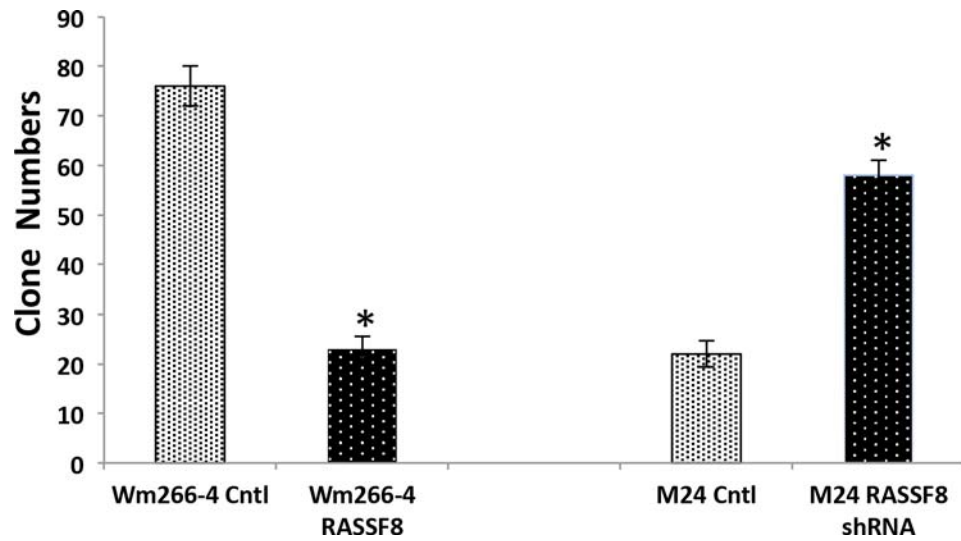

**Supplementary Figure S7: Quantification of clones.** Number of clones in Wm266-4 RASSF8 was significantly decreased compared to Wm266-4 Cntl ( $N = 3$ ), whereas number of clones in M24 RASSF8 shRNA was significantly increased compared to M24 Cntl ( $N = 3$ ,  $*p < 0.05$ ).

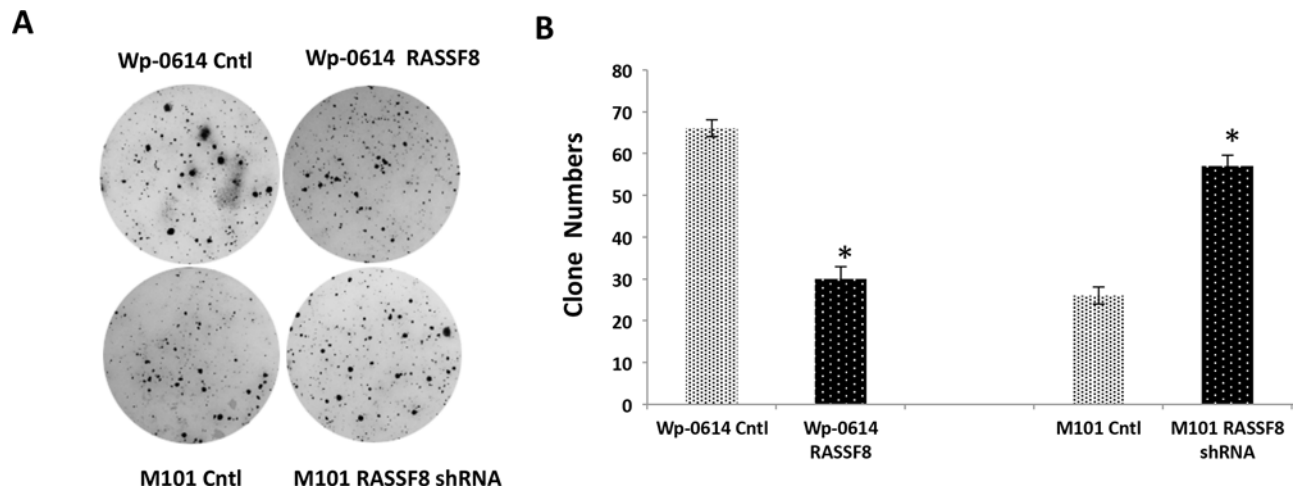

**Supplementary Figure S8: Colony formation assay of Wp-0614 Cntl and Wp-0614 RASSF8, M101 Cntl and M101 shRNA. A.** Colony formation of Wp-0614 Cntl vs Wp-0614 RASSF8, M101 Cntl vs M101 shRNA. **B.** Quantification of clones in Wp-0614 Cntl vs Wp-0614 RASSF8, M101 Cntl vs M101 shRNA. Number of clones in Wp-0614 RASSF8 was significantly decreased compared to Wp-0614 Cntl ( $N = 3$ ), whereas number of clones in M101 RASSF8 shRNA was significantly increased compared to M101 Cntl ( $N = 3$ ,  $*p < 0.05$ ).

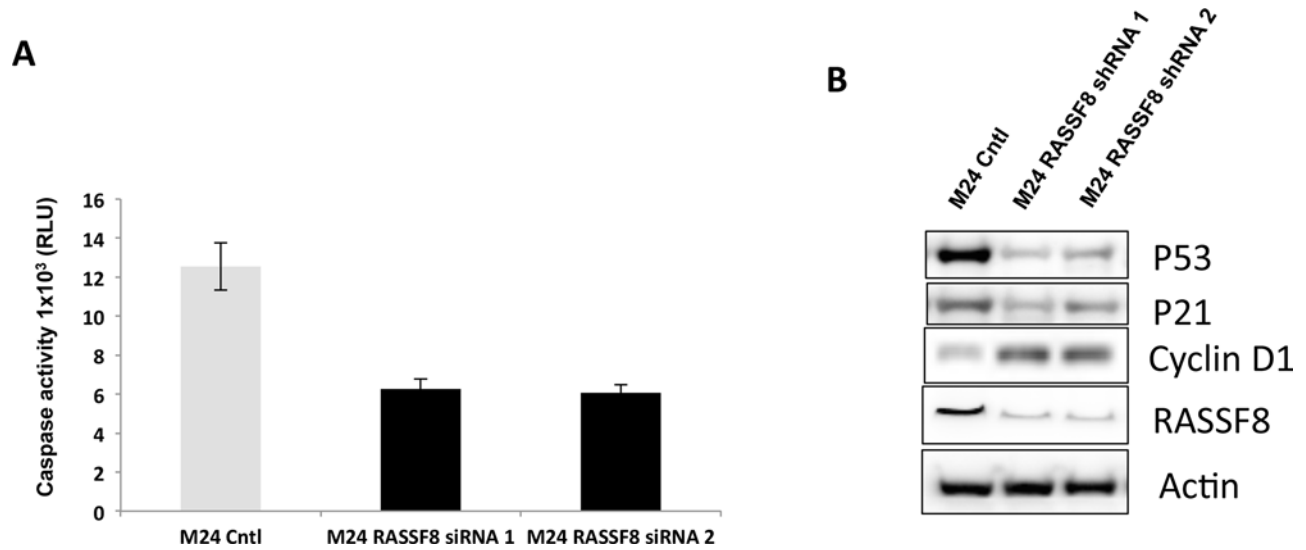

**Supplementary Figure S9: RASSF8 regulated P53-P21 pathway.** **A.** Caspase activity was reduced when RASSF8 was knocked down by RASSF8 siRNA in M24 cells. **B.** Expression of P53 and P21 was reduced while expression of Cyclin D1 was increased when RASSF8 was knocked down by RASSF8 siRNA in M24 cells.

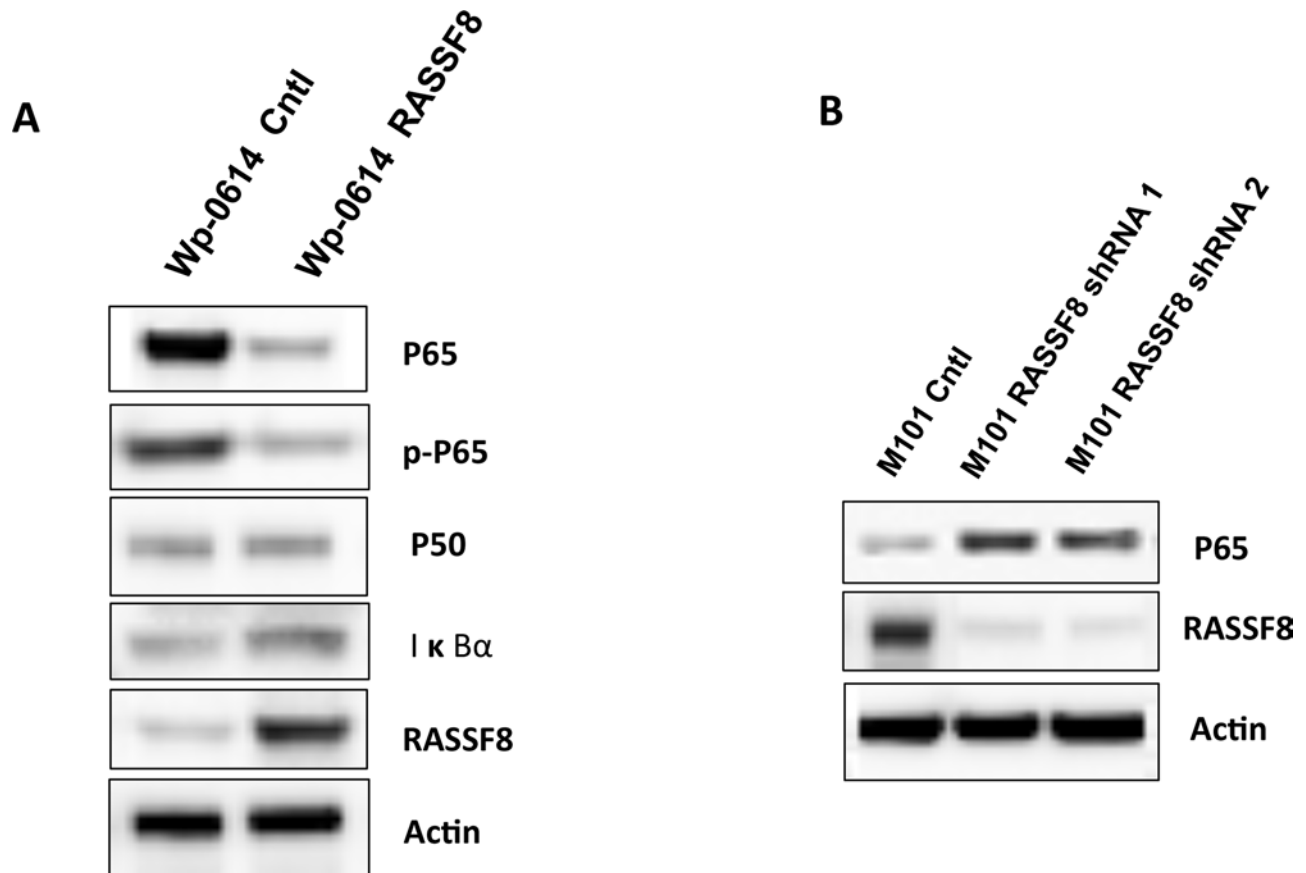

**Supplementary Figure S10: RASSF8 regulated expression of P65, p-P65 and I $\kappa$ B $\alpha$  in melanoma cell lines. A.** Overexpression of RASSF8 in Wp-0614 cells (Wm266-4-RASSF8) reduced expression of P65 and p-P65 but increased expression of I $\kappa$ B $\alpha$ . **B.** Knockdown of RASSF8 in M101 cells (M101-RASSF8 shRNA) increased P65 expression.

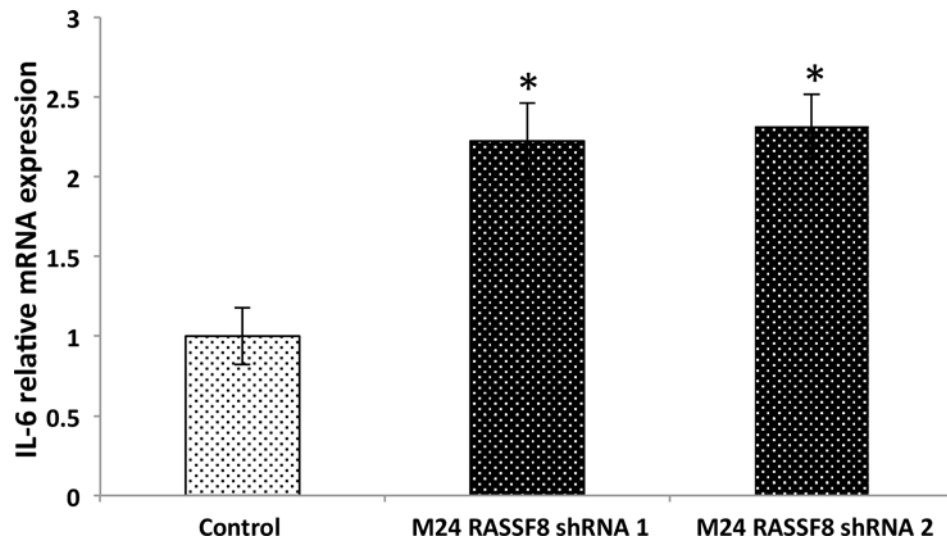

**Supplementary Figure S11: IL-6 mRNA expression in tumors from control cells and RASSF8 shRNA cells.** IL-6 mRNA expression was significantly increased in RASSF8 shRNA cells compared to control cells ( $N = 3$ ,  $*p < 0.05$ ).

**A**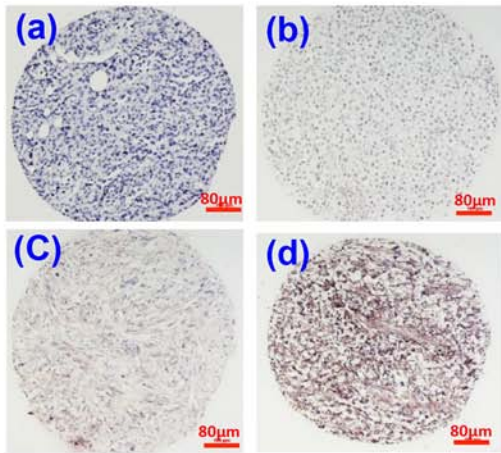**B**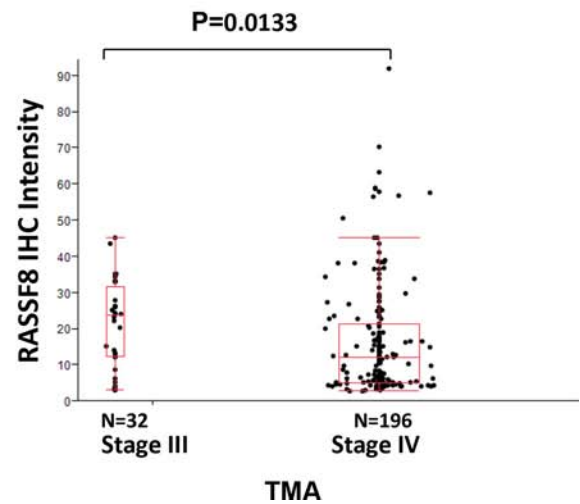

**Supplementary Figure S12: RASSF8 Immunohistochemistry of TMA.** A. Representative photographs of TMA. Negative (a); Low (b); Medium (c); High; and (d) RASSF8 expression. B. RASSF8 expression was significantly lower in stage IV than stage III melanomas.

**Supplementary Table S1: Primers for RT-qPCR Assays**

| Biomarker            | Forward                  | Reverse              |
|----------------------|--------------------------|----------------------|
| RASSF8               | CAAAGGGGAGATTGACA        | TTCCTGTTCTTTGTCCTG   |
| Beta-2-microglobulin | TGTCACAGCCCAAGATAG       | CCAGCAAGCAGAATTTGGAA |
| IL-6                 | TCCAGAACAGATTTGAGAGTAGTG | GCATTTGTGGTTGGGTCAGG |

**Supplementary Table S2: RASSF8 Primers for Methylation Assays**

| Type | Forward                   | Reverse                      |
|------|---------------------------|------------------------------|
| M-1  | CGTTTTTATTTTGTTCGTCGC     | CAATCCGCGACTTATATACCG        |
| M-2  | TTTCGTCGCGGGTTTTCG        | CAATCCGCGACTTATATACCG        |
| U    | TTTGTTTTGTTTTTATTTTGTTTTG | CTTTTCAATCCACAACCTTATATACCAC |
